# Supplementary material
Source: Springer Nature journal article supplement (https://www.springermedizin.de/resource/supplementary/13063_2008_311_MOESM2_ESM.pdf/9617954)

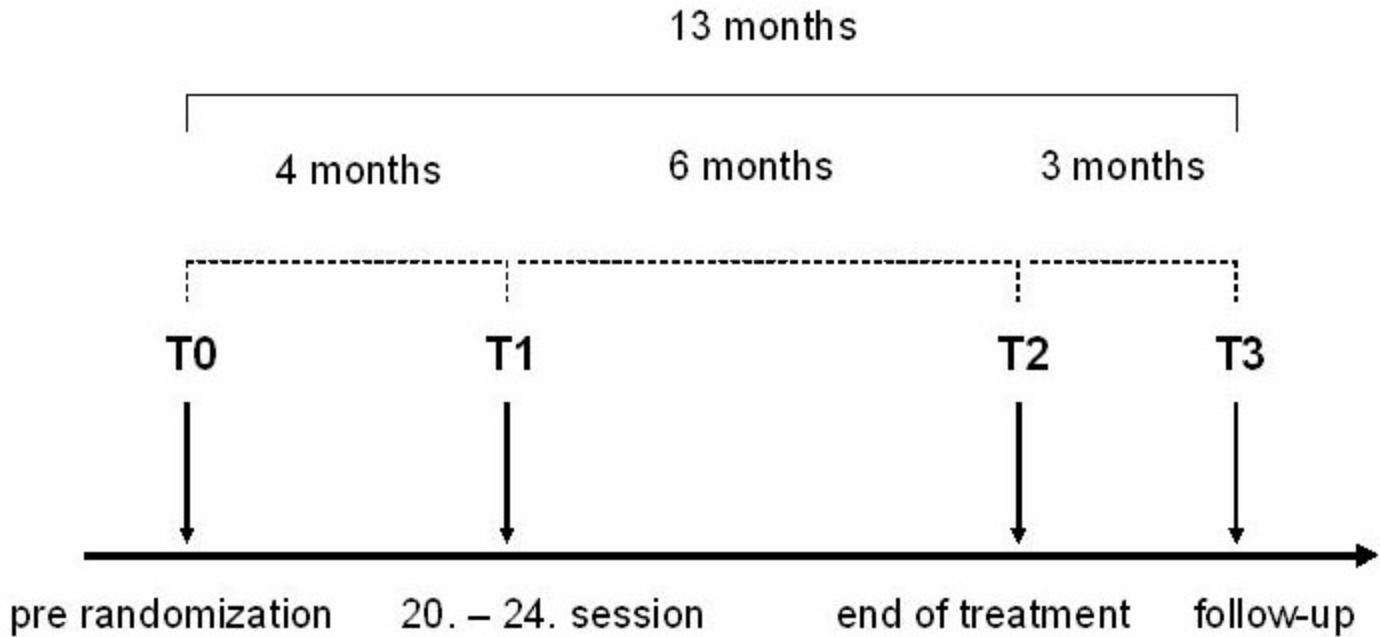

Supplement: MOESM2 [file 9617954]
